# Supplementary material for: Optimal Policies for a Dual-Sourcing Inventory Problem with Endogenous Stochastic Lead Times
Source: Atypon-hosted journal article supplement (doi:10.1287/opre.2016.1557), 2016-12-16
Supplement: opre.2016.1557-sm.pdf [file opre.2016.1557-sm.pdf]

## Electronic Companion to “Optimal Policies for a Dual-Sourcing Inventory Problem with Endogenous Stochastic Lead Times”

For any function  $g(x, y, z)$ , define

$$\begin{aligned}\mathcal{L}^g(x, y, z) = & \lambda g(x-1, y, z) + \mu_1 [\mathbf{I}_{\{z>0\}} g(x, y+1, z-1) + \mathbf{I}_{\{z=0\}} g(x, y, z)] \\ & + \mu_2 [\mathbf{I}_{\{y>0\}} g(x+1, y-1, z) + \mathbf{I}_{\{y=0\}} g(x, y, z)].\end{aligned}$$

**Proof of Lemma 1.** For the first inequality in (2), it suffices to show that

$$c_2 + \Delta_y(hx^+ + bx^- + h_2y + h_1z + \mathcal{T}f(x, y, z)) \geq 0. \quad (\text{EC.1})$$

(EC.1) is true because

$$\begin{aligned}& c_2 + \Delta_y(hx^+ + bx^- + h_2y + h_1z + \mathcal{T}f(x, y, z)) \\ &= c_2 + h_2 + \min_{u \geq y+1, v \geq z} \left\{ (h_2 + c_2)(u - (y+1)) + (h_1 + c_1)(v - z) + \mathcal{L}^f(x, u, v) \right\} \\ & \quad - \min_{u \geq y, v \geq z} \left\{ (h_2 + c_2)(u - y) + (h_1 + c_1)(v - z) + \mathcal{L}^f(x, u, v) \right\} \\ &= \min_{u \geq y+1, v \geq z} \left\{ (h_2 + c_2)(u - y) + (h_1 + c_1)(v - z) + \mathcal{L}^f(x, u, v) \right\} \\ & \quad - \min_{u \geq y, v \geq z} \left\{ (h_2 + c_2)(u - y) + (h_1 + c_1)(v - z) + \mathcal{L}^f(x, u, v) \right\} \\ & \geq 0.\end{aligned}$$

This proves the first inequality in (2). The second inequality follows similarly.

Now we prove that it is not optimal to order from server 2 when  $y > 0$ , nor to order from server 1 when  $z > 0$ . In view of the optimality equation (1), it suffices to show that, for any nonnegative integers  $m, n \geq 0$ ,

$$\mathcal{L}^f(x, y+m, z+n) \leq \mathcal{L}^f(x, y+m+1, z+n+1) + c_1 + c_2 + h_1 + h_2 \quad \text{if } y > 0 \text{ and } z > 0, \quad (\text{EC.2})$$

$$\mathcal{L}^f(x, y, z+n) \leq \mathcal{L}^f(x, y, z+n+1) + c_1 + h_1 \quad \text{if } y = 0 \text{ and } z > 0, \quad (\text{EC.3})$$

$$\mathcal{L}^f(x, y+m, z) \leq \mathcal{L}^f(x, y+m+1, z) + c_2 + h_2 \quad \text{if } y > 0 \text{ and } z = 0. \quad (\text{EC.4})$$

To verify (EC.2), we have when  $y > 0$  and  $z > 0$ ,

$$\begin{aligned}& \mathcal{L}^f(x, y+m+1, z+n+1) + c_1 + c_2 + h_1 + h_2 - \mathcal{L}^f(x, y+m, z+n) \\ &= c_1 + c_2 + h_1 + h_2 + \lambda [\Delta_y f(x-1, y+m, z+n+1) + \Delta_z f(x-1, y+m, z+n)] \\ & \quad + \mu_1 [\Delta_y f(x, y+m+1, z+n) + \Delta_z f(x, y+m+1, z+n-1)]\end{aligned}$$

$$\begin{aligned}
& +\mu_2[\Delta_y f(x+1, y+m-1, z+n+1) + \Delta_z f(x+1, y+m-1, z+n)] \\
= & h_1 + h_2 + \lambda[c_2 + \Delta_y f(x-1, y+m, z+n+1)] + \mu_1[c_2 + \Delta_y f(x, y+m+1, z+n)] \\
& +\mu_2[c_2 + \Delta_y f(x+1, y+m-1, z+n+1)] + (1-\lambda-\mu_1-\mu_2)c_2 \\
& +\lambda[c_1 + \Delta_z f(x-1, y+m, z+n)] + \mu_1[c_1 + \Delta_z f(x, y+m+1, z+n-1)] \\
& +\mu_2[c_1 + \Delta_z f(x+1, y+m-1, z+n)] + (1-\lambda-\mu_1-\mu_2)c_1 \\
\geq & h_1 + h_2 + (1-\lambda-\mu_1-\mu_2)(c_1 + c_2) \\
\geq & 0,
\end{aligned}$$

where the first inequality follows from (2), and the last from  $\alpha + \lambda + \mu_1 + \mu_2 = 1$ . Thus, (EC.2) holds. Similarly, one can verify (EC.3)-(EC.4).  $\square$

**Proof of Lemma 2.** The argument for this lemma is similar to that of Lemma 1.  $\square$

**Proof of Lemma 3.** In view of (1), we have

$$\begin{aligned}
f(x, y, 0) = & hx^+ + bx^- + h_2y \\
& + \min_{u \geq y, v \geq 0} \left\{ c_1v + (h_2 + c_2)(u - y) + \mathcal{L}^f(x, u, v) \right\}, \tag{EC.5}
\end{aligned}$$

$$f(x, 0, 1) = hx^+ + bx^- + \min_{u \geq 0} \left\{ (h_2 + c_2)u + \mathcal{L}^f(x, u, 1) \right\}. \tag{EC.6}$$

Similarly, from (3), we have

$$\begin{aligned}
\hat{f}(x, y, 0) = & hx^+ + bx^- + h_2y \\
& + \min_{u \geq y, v \geq 0} \left\{ (h_2 + c_2)(u - y) + \mathcal{L}^{\hat{f}}(x, u, v) + \mu_1 \mathbf{I}_{\{v > 0\}} \tilde{c}_1 \right\}, \tag{EC.7}
\end{aligned}$$

$$\hat{f}(x, 0, 1) = hx^+ + bx^- + \min_{u \geq 0} \left\{ (h_2 + c_2)u + \mathcal{L}^{\hat{f}}(x, u, 1) + \mu_1 \tilde{c}_1 \right\}. \tag{EC.8}$$

To prove that System **O** and System **M** have the same optimal policy, it is sufficient to show that (EC.5) and (EC.7) have the same solution, and (EC.6) and (EC.8) have the same solution. Notice that the right-hand sides of equations (EC.5)-(EC.8) both involve minimum operations. Therefore, for (EC.5) and (EC.7) to have the same solution, it is sufficient that, for any fixed integer  $x$  and nonnegative integer  $y$ ,

$$c_1 + \mathcal{L}^f(x, y, 1) \geq \mathcal{L}^f(x, y, 0) \quad \text{if and only if} \quad \mu_1 \tilde{c}_1 + \mathcal{L}^{\hat{f}}(x, y, 1) \geq \mathcal{L}^{\hat{f}}(x, y, 0), \tag{EC.9}$$

$$h_2 + c_2 + \mathcal{L}^f(x, y + 1, 0) \geq \mathcal{L}^f(x, y, 0) \quad \text{if and only if}$$

$$h_2 + c_2 + \mathcal{L}^{\hat{f}}(x, y + 1, 0) \geq \mathcal{L}^{\hat{f}}(x, y, 0), \tag{EC.10}$$

$$c_1 + h_2 + c_2 + \mathcal{L}^f(x, y + 1, 1) \geq \mathcal{L}^f(x, y, 0) \quad \text{if and only if}$$

$$\mu_1 \tilde{c}_1 + h_2 + c_2 + \mathcal{L}^{\hat{f}}(x, y + 1, 1) \geq \mathcal{L}^{\hat{f}}(x, y, 0). \tag{EC.11}$$

Also, for (EC.6) and (EC.8) to have the same solution, it is sufficient that, for any fixed nonnegative integer  $x$ ,

$$\begin{aligned} h_2 + c_2 + \mathcal{L}^f(x, 1, 1) &\geq \mathcal{L}^f(x, 0, 1) \text{ if and only if} \\ h_2 + c_2 + \mathcal{L}^{\hat{f}}(x, 1, 1) &\geq \mathcal{L}^{\hat{f}}(x, 0, 1). \end{aligned} \quad (\text{EC.12})$$

But it directly follows from (5)-(6) that

$$\begin{aligned} c_1 + \mathcal{L}^f(x, y, 1) &= (\alpha + \mu_1)c_1 + \mathcal{L}^{\hat{f}}(x, y, 1), \\ \mathcal{L}^f(x, y, 0) &= \mathcal{L}^{\hat{f}}(x, y, 0), \\ h_2 + c_2 + \mathcal{L}^f(x, 1, 1) - \mathcal{L}^f(x, 0, 1) &= h_2 + c_2 + \mathcal{L}^{\hat{f}}(x, 1, 1) - \mathcal{L}^{\hat{f}}(x, 0, 1). \end{aligned}$$

Consequently, (EC.9)-(EC.12) hold, and the lemma is proven.  $\square$

**Proof of Lemma 4.** It follows from (7) that

$$\begin{aligned} &c_2 + \Delta_y \tilde{f}(x, y) \\ &= h_2 + c_2 + \min_{u \geq y+1} \left\{ (h_2 + c_2)(u - y - 1) + \lambda \tilde{f}(x - 1, u) \right. \\ &\quad \left. + \mu_1 \min\{\tilde{f}(x, u + 1) + \tilde{c}_1, \tilde{f}(x, u)\} \right. \\ &\quad \left. + \mu_2 [\mathbf{I}_{\{u > 0\}} \tilde{f}(x + 1, u - 1) + \mathbf{I}_{\{u = 0\}} \tilde{f}(x, u)] \right\} \\ &\quad - \min_{u \geq y} \left\{ (h_2 + c_2)(u - y) + \lambda \tilde{f}(x - 1, u) + \mu_1 \min\{\tilde{f}(x, u + 1) + \tilde{c}_1, \tilde{f}(x, u)\} \right. \\ &\quad \left. + \mu_2 [\mathbf{I}_{\{u > 0\}} \tilde{f}(x + 1, u - 1) + \mathbf{I}_{\{u = 0\}} \tilde{f}(x, u)] \right\} \\ &\geq \min_{u \geq y} \left\{ (h_2 + c_2)(u - y) + \lambda \tilde{f}(x - 1, u) + \mu_1 \min\{\tilde{f}(x, u + 1) + \tilde{c}_1, \tilde{f}(x, u)\} \right. \\ &\quad \left. + \mu_2 [\mathbf{I}_{\{u > 0\}} \tilde{f}(x + 1, u - 1) + \mathbf{I}_{\{u = 0\}} \tilde{f}(x, u)] \right\} \\ &\quad - \min_{u \geq y} \left\{ (h_2 + c_2)(u - y) + \lambda \tilde{f}(x - 1, u) + \mu_1 \min\{\tilde{f}(x, u + 1) + \tilde{c}_1, \tilde{f}(x, u)\} \right. \\ &\quad \left. + \mu_2 [\mathbf{I}_{\{u > 0\}} \tilde{f}(x + 1, u - 1) + \mathbf{I}_{\{u = 0\}} \tilde{f}(x, u)] \right\} \\ &= 0. \end{aligned}$$

Hence, we have (8). The second part of the lemma follows from an argument along the same lines as that of the second part of Lemma 3 (i).  $\square$

**Proof of Lemma 5.** First the uniqueness of  $S(y)$  directly follows from its definition. It can be  $-\infty$ ,  $+\infty$ , or any integer in between. Supermodularity of  $\tilde{f}(x, y)$  implies that  $\tilde{f}(x, y) + \tilde{c}_1$  is increasing in  $x$ . Thus we have that  $\tilde{f}(x, y) + \tilde{c}_1 < 0$  for  $x < S(y)$ , and  $\tilde{f}(x, y) + \tilde{c}_1 \geq 0$  for  $x \geq S(y)$ . Property (P3) of  $\tilde{f}(x, y)$  implies that  $\tilde{f}(x, y) + \tilde{c}_1$  is increasing in  $y$ . Using these two results, we will have  $S(y) \leq S(y - 1)$ , which implies the monotonicity of  $S(\cdot)$ .

We now, by contradiction, prove that if  $S(y)$  and  $S(y-1)$  are finite, then  $S(y) < S(y-1)$ . Suppose there exists  $y_0$  such that

$$S(y_0) = S(y_0 + 1).$$

By the definition of  $S(\cdot)$ , we have

$$\Delta_y \tilde{f}(S(y_0), y_0) + \tilde{c}_1 \geq 0$$

and

$$\Delta_y \tilde{f}(S(y_0) - 1, y_0 + 1) + \tilde{c}_1 < 0,$$

which together imply

$$\Delta_y \tilde{f}(S(y_0), y_0) > \Delta_y \tilde{f}(S(y_0) - 1, y_0 + 1).$$

This contradicts Property (P3),  $\Delta_{yy} \tilde{f}(S(y_0) - 1, y_0) \geq \Delta_{xy} \tilde{f}(S(y_0) - 1, y_0)$ , which can be rewritten as  $\Delta_y \tilde{f}(S(y_0), y_0) \leq \Delta_y \tilde{f}(S(y_0) - 1, y_0 + 1)$ .  $\square$

**Proof of Lemma 6.** The uniqueness of  $R$  is directly given by its definition. By the supermodularity and convexity of  $\tilde{f}(x, y)$  in  $x$ , the quantity  $h_2 + c_2 - \mu_1 \tilde{c}_1 + \lambda \Delta_y \tilde{f}(x-1, 0) + \mu_2 \Delta_x \tilde{f}(x, 0)$  is increasing in  $x$ , and  $-\mu_1 (\Delta_y \tilde{f}(x, 1) + \tilde{c}_1) \mathbf{I}_{\{x < S(1)\}} - \mu_1 (\Delta_y \tilde{f}(x, 0) + \tilde{c}_1) \mathbf{I}_{\{x \geq S(0)\}}$  is decreasing in  $x$ . Thus

$$\begin{aligned} & h_2 + c_2 - \mu_1 \tilde{c}_1 + \lambda \Delta_y \tilde{f}(x-1, 0) + \mu_2 \Delta_x \tilde{f}(x, 0) \\ & < -\mu_1 (\Delta_y \tilde{f}(x, 1) + \tilde{c}_1) \mathbf{I}_{\{x < S(1)\}} - \mu_1 (\Delta_y \tilde{f}(x, 0) + \tilde{c}_1) \mathbf{I}_{\{x \geq S(0)\}} \quad \text{for } x < R; \\ & h_2 + c_2 - \mu_1 \tilde{c}_1 + \lambda \Delta_y \tilde{f}(x-1, 0) + \mu_2 \Delta_x \tilde{f}(x, 0) \\ & \geq -\mu_1 (\Delta_y \tilde{f}(x, 1) + \tilde{c}_1) \mathbf{I}_{\{x < S(1)\}} - \mu_1 (\Delta_y \tilde{f}(x, 0) + \tilde{c}_1) \mathbf{I}_{\{x \geq S(0)\}} \quad \text{for } x \geq R. \end{aligned}$$

This implies that for state  $(x, 0)$ , if  $x < R$ , it is optimal to feed server 2; if  $x \geq R$ , it is optimal to do nothing at server 2.  $\square$

**Proof of Lemma 7.** It suffices to show that, for any positive integer  $y$ ,

$$\begin{aligned} & \lambda \psi(x-1, y) + \mu_1 \min\{\psi(x, y+1) + \tilde{c}_1, \psi(x, y)\} + \mu_2 \psi(x+1, y-1) \\ & \leq (h_2 + c_2) + \lambda \psi(x-1, y+1) \\ & \quad + \mu_1 \min\{\psi(x, y+2) + \tilde{c}_1, \psi(x, y+1)\} + \mu_2 \psi(x+1, y). \end{aligned} \tag{EC.13}$$

Consider two cases:

$$\min\{\psi(x, y+2) + \tilde{c}_1, \psi(x, y+1)\} = \psi(x, y+1),$$

and

$$\min\{\psi(x, y+2) + \tilde{c}_1, \psi(x, y+1)\} = \psi(x, y+2) + \tilde{c}_1.$$

For the first case,

$$\begin{aligned}
& (h_2 + c_2) + \lambda\psi(x-1, y+1) + \mu_1 \min\{\psi(x, y+2) + \tilde{c}_1, \psi(x, y+1)\} + \mu_2\psi(x+1, y) \\
& - \left( \lambda\psi(x-1, y) + \mu_1 \min\{\psi(x, y+1) + \tilde{c}_1, \psi(x, y)\} + \mu_2\psi(x+1, y-1) \right) \\
& = (h_2 + c_2) + \lambda\psi(x-1, y+1) + \mu_1\psi(x, y+1) + \mu_2\psi(x+1, y) \\
& - \left( \lambda\psi(x-1, y) + \mu_1 \min\{\psi(x, y+1) + \tilde{c}_1, \psi(x, y)\} + \mu_2\psi(x+1, y-1) \right) \\
& \geq (h_2 + c_2) + \lambda\psi(x-1, y+1) + \mu_1\psi(x, y+1) + \mu_2\psi(x+1, y) \\
& - \left( \lambda\psi(x-1, y) + \mu_1\psi(x, y) + \mu_2\psi(x+1, y-1) \right) \\
& = (h_2 + c_2) + \lambda\Delta_y\psi(x-1, y) + \mu_1\Delta_y\psi(x, y) + \mu_2\Delta_y\psi(x+1, y-1) \\
& \geq h_2 + \lambda(c_2 + \lambda\Delta_y\psi(x-1, y)) + \mu_1(c_2 + \Delta_y\psi(x, y)) + \mu_2(c_2 + \Delta_y\psi(x+1, y-1)) \\
& \geq 0.
\end{aligned}$$

Hence, (EC.13) holds. By a similar argument, (EC.13) holds in the second case.  $\square$

**Proof of Lemma 8.** Define

$$g(x, y) = \min \left\{ \psi(x, y), \psi(x, y+1) + \tilde{c}_1 \right\}. \quad (\text{EC.14})$$

In order to prove the lemma, by the definition of  $\tilde{T}$  and Lemma 7, we need only prove that  $g(x, y)$  satisfies Properties (P1)-(P3) for  $y > 0$ , provided that  $\psi(x, y)$  satisfies (P1)-(P3) for  $y \geq 0$ .

First we prove supermodularity of  $g(x, y)$ :

$$g(x+1, y+1) + g(x, y) \geq g(x+1, y) + g(x, y+1). \quad (\text{EC.15})$$

Define

$$G(x, y, w) = w \cdot \left( \psi(x, y+1) + \tilde{c}_1 \right) + (1-w) \cdot \psi(x, y).$$

Then, by the definition of  $g(\cdot, \cdot)$  in (EC.14),

$$g(x, y) = \min_{w \in \{0,1\}} G(x, y, w). \quad (\text{EC.16})$$

By the supermodularity of  $\psi(x, y)$ ,

$$\Delta_x G(x, y, 1) = \Delta_x \psi(x, y+1) \geq \Delta_x \psi(x, y) = \Delta_x G(x, y, 0).$$

Hence,  $G(x, y, w)$  is supermodular in  $(x, w)$ . Similarly, one can show that  $G(x, y, w)$  is supermodular in  $(y, w)$  for  $y \geq 0$ . Let

$$g(x, y) = G(x, y, w_1) \quad \text{and} \quad g(x+1, y+1) = G(x+1, y+1, w_2).$$

If  $w_1 \leq w_2$ , then

$$\begin{aligned}
& g(x+1, y) + g(x, y+1) \\
& \leq G(x+1, y, w_1) + G(x, y+1, w_2) \\
& \leq G(x+1, y, w_2) + G(x, y, w_1) - G(x, y, w_2) + G(x, y+1, w_2) \\
& \leq G(x, y, w_1) + G(x+1, y+1, w_2) \\
& = g(x, y) + g(x+1, y+1),
\end{aligned}$$

where the first inequality uses (EC.16), the supermodularity of  $G(x, y, w)$  in  $(x, w)$  implies the second inequality, and the last inequality follows from the supermodularity of  $G(x, y, w)$  for fixed  $w$ . Equation (EC.15) follows immediately.

If  $w_1 > w_2$ , then  $w_1 = 1$  and  $w_2 = 0$ . Thus,

$$\begin{aligned}
& [g(x+1, y) + g(x, y+1)] - [g(x+1, y+1) + g(x, y)] \\
& = \min \left\{ \psi(x+1, y+1) + \tilde{c}_1, \psi(x+1, y) \right\} + \min \left\{ \psi(x, y+2) + \tilde{c}_1, \psi(x, y+1) \right\} \\
& \quad - \psi(x+1, y+1) - \psi(x, y+1) - \tilde{c}_1 \\
& \leq \psi(x+1, y+1) + \tilde{c}_1 + \psi(x, y+1) - \psi(x+1, y+1) - \psi(x, y+1) - \tilde{c}_1 \\
& = 0,
\end{aligned}$$

which again yields (EC.15).

Second, we prove diagonal dominance in  $x$ , that is,  $\Delta_{xx}g(x, y) \geq \Delta_{xy}g(x, y)$ , or

$$g(x+2, y) + g(x, y+1) \geq g(x+1, y+1) + g(x+1, y). \quad (\text{EC.17})$$

Let

$$g(x+2, y) = G(x+2, y, w_2) \quad \text{and} \quad g(x, y+1) = G(x, y+1, w_1).$$

The proof of (EC.17) is divided into two cases.

Case (i):  $w_1 \leq w_2$ . Here,

$$\begin{aligned}
& g(x+1, y+1) + g(x+1, y) \\
& \leq G(x+1, y+1, w_1) + G(x+1, y, w_2) \\
& \leq G(x+1, y+1, w_1) + G(x+2, y, w_2) + G(x+1, y, w_1) - G(x+2, y, w_1) \\
& \leq G(x, y+1, w_1) + G(x+2, y, w_2) \\
& = g(x+2, y) + g(x, y+1).
\end{aligned}$$

The first inequality follows from (EC.16), the second comes from the supermodularity of  $G(x, y, w)$  in  $(x, w)$ , and the third is due to the diagonal dominance of  $G(x, y, w)$  for fixed  $w$ . Hence, (EC.17) holds.

Case (ii):  $w_1 > w_2$ , that is,  $w_1 = 1$  and  $w_2 = 0$ . First,

$$g(x+2, y) = \psi(x+2, y) \quad g(x, y+1) = \psi(x, y+2) + \tilde{c}_1,$$

Then,

$$\begin{aligned} & g(x+1, y+1) + g(x+1, y) - g(x+2, y) - g(x, y+1) \\ &= \min \left\{ \psi(x+1, y+1), \psi(x+1, y+2) + \tilde{c}_1 \right\} \\ & \quad + \min \left\{ \psi(x+1, y), \psi(x+1, y+1) + \tilde{c}_1 \right\} \\ & \quad - \psi(x+2, y) - \psi(x, y+2) - \tilde{c}_1 \\ &\leq \psi(x+1, y+1) - \psi(x+2, y) - \psi(x, y+2) + \psi(x+1, y+1) \\ &= \psi(x+1, y+1) - \psi(x+1, y) + \psi(x+1, y) - \psi(x+2, y) \\ & \quad - \psi(x, y+2) + \psi(x, y+1) - \psi(x, y+1) + \psi(x+1, y+1) \\ &= \Delta_y \psi(x+1, y) - \Delta_x \psi(x+1, y) - \Delta_y \psi(x, y+1) + \Delta_x \psi(x, y+1) \\ &= \Delta_{xy} \psi(x, y) - \Delta_{yy} \psi(x, y) - \left( \Delta_{xx} \psi(x, y) - \Delta_{xy} \psi(x, y) \right) \\ &\leq 0. \end{aligned}$$

This implies (EC.17).

To prove that  $g(x, y)$  satisfies Property (P3), we just follow the same procedure as above for property (P2). That is, replace  $\Delta_{xx}$  by  $\Delta_{yy}$ , and keep  $\Delta_{xy}$  as is.  $\square$

**Proof of Lemma 9.** We need to prove the following three inequalities:

$$\tilde{\mathcal{T}}\psi(x+1, 1) + \tilde{\mathcal{T}}\psi(x, 0) \geq \tilde{\mathcal{T}}\psi(x+1, 0) + \tilde{\mathcal{T}}\psi(x, 1), \quad (\text{EC.18})$$

$$\tilde{\mathcal{T}}\psi(x+2, 0) + \tilde{\mathcal{T}}\psi(x, 1) \geq \tilde{\mathcal{T}}\psi(x+1, 1) + \tilde{\mathcal{T}}\psi(x+1, 0), \quad (\text{EC.19})$$

$$\tilde{\mathcal{T}}\psi(x, 2) + \tilde{\mathcal{T}}\psi(x+1, 0) \geq \tilde{\mathcal{T}}\psi(x+1, 1) + \tilde{\mathcal{T}}\psi(x, 1). \quad (\text{EC.20})$$

Define  $H(x, y, w)$  by

$$\begin{aligned} & \frac{1}{2}w(2-w)(3-w) \left[ (h_2 + c_2) + \lambda\psi(x-1, y+1) + \mu_1\psi(x, y+1) + \mu_2\psi(x+1, y) \right] \\ & + \frac{1}{6}(1-w)(2-w)(3-w) \left[ (h_2 + c_2) + \lambda\psi(x-1, y+1) + \mu_1\psi(x, y+2) \right. \\ & \quad \left. + \mu_1\tilde{c}_1 + \mu_2\psi(x+1, y) \right] \\ & + \frac{1}{6}w(w-1)(w-2) \left[ \lambda\psi(x-1, y) + \mu_1\psi(x, y) + \mu_2\mathbf{I}_{\{y>0\}}\psi(x+1, y-1) \right] \end{aligned}$$

$$\begin{aligned}
& + \mu_2 \mathbf{I}_{\{y=0\}} \psi(x, y) \Big] \\
& + \frac{1}{2} w(w-1)(3-w) \Big[ \lambda \psi(x-1, y) + \mu_1 \psi(x, y+1) + \mu_1 \tilde{c}_1 \\
& \quad + \mu_2 \mathbf{I}_{\{y>0\}} \psi(x+1, y-1) + \mu_2 \mathbf{I}_{\{y=0\}} \psi(x, y) \Big].
\end{aligned}$$

Based on an argument similar to the discussion of  $G(x, y, w)$  in the proof of Lemma 8,  $H(x, y, w)$  is submodular in  $(x, w)$ , i.e.,

$$\Delta_x H(x, y, 0) \geq \Delta_x H(x, y, 1) \geq \Delta_x H(x, y, 2) \geq \Delta_x H(x, y, 3).$$

For  $y \geq 0$ , by (16),  $H(x, y, w)$  is submodular in  $(y, w)$ , i.e.,

$$\Delta_y H(x, y, 0) \geq \Delta_y H(x, y, 1) \geq \Delta_y H(x, y, 2) \geq \Delta_y H(x, y, 3).$$

Finally, for fixed  $w$ , by (16),  $H(x, y, w)$  satisfies Properties (P1)-(P3). We can rewrite

$$\tilde{\mathcal{T}}\psi(x, y) = \min_{w \in \{0, 1, 2, 3\}} H(x, y, w). \quad (\text{EC.21})$$

First, we prove inequality (EC.18). To do this, let

$$\tilde{\mathcal{T}}\psi(x+1, 1) = H(x+1, 1, w_2) \quad \text{and} \quad \tilde{\mathcal{T}}\psi(x, 0) = H(x, 0, w_1).$$

The proof is divided into several cases.

Case a.i:  $w_1 \geq w_2$ . For this case,

$$\begin{aligned}
\tilde{\mathcal{T}}\psi(x+1, 0) + \tilde{\mathcal{T}}\psi(x, 1) & \leq H(x+1, 0, w_1) + H(x, 1, w_2) \\
& \leq H(x+1, 0, w_2) + H(x, 0, w_1) - H(x, 0, w_2) + H(x, 1, w_2) \\
& \leq H(x+1, 1, w_2) + H(x, 0, w_1) \\
& = \tilde{\mathcal{T}}\psi(x+1, 1) + \tilde{\mathcal{T}}\psi(x, 0),
\end{aligned}$$

where the second inequality follows from the submodularity of  $H(x, y, w)$  in  $(x, w)$ , and the last inequality comes from the supermodularity of  $H(x, y, w)$  given  $w$ . Thus, (EC.18) holds.

Case a.ii:  $w_1 < w_2$ . Note that, by Properties (P1)-(P3) of  $\psi(\cdot, \cdot)$ , the minimizer of the right-hand side of the following equation (EC.22) is 1:

$$\begin{aligned}
\tilde{\mathcal{T}}\psi(x+1, 1) & = \inf_{u \geq 1} \left\{ (h_2 + c_2)(u-1) + \lambda \psi(x, u) \right. \\
& \quad \left. + \mu_1 \min\{\psi(x+1, u+1) + \tilde{c}_1, \psi(x+1, u)\} + \mu_2 \psi(x+2, u-1) \right\}.
\end{aligned} \quad (\text{EC.22})$$

Hence, according to the definition of  $w_2$  and (EC.21),  $w_2$  can only take the values 2 or 3. Thus, we divide this case into five subcases, namely,  $(w_1, w_2) = (0, 2)$ ,  $(w_1, w_2) = (0, 3)$ ,  $(w_1, w_2) = (1, 2)$ ,  $(w_1, w_2) = (1, 3)$ , and  $(w_1, w_2) = (2, 3)$ .

Subcase a.ii.1:  $(w_1, w_2) = (0, 2)$ . By (EC.21),

$$\begin{aligned}
& \tilde{\mathcal{T}}\psi(x+1, 0) + \tilde{\mathcal{T}}\psi(x, 1) \\
& \leq h_2 + c_2 + \lambda\psi(x, 1) + \mu_1\psi(x+1, 2) + \mu_1\tilde{c}_1 + \mu_2\psi(x+2, 0) \\
& \quad + \lambda\psi(x-1, 1) + \mu_1\psi(x, 2) + \mu_1\tilde{c}_1 + \mu_2\psi(x+1, 0) \\
& = \lambda\psi(x, 1) + \mu_1\psi(x+1, 2) + \mu_1\tilde{c}_1 + \mu_2\psi(x+2, 0) \\
& \quad + h_2 + c_2 + \lambda\psi(x-1, 1) + \mu_1\psi(x, 2) + \mu_1\tilde{c}_1 + \mu_2\psi(x+1, 0) \\
& = \tilde{\mathcal{T}}\psi(x+1, 1) + \tilde{\mathcal{T}}\psi(x, 0).
\end{aligned}$$

This yields (EC.18).

Subcase a.ii.2:  $(w_1, w_2) = (0, 3)$ . Again, by (EC.21),

$$\begin{aligned}
& \tilde{\mathcal{T}}\psi(x+1, 0) + \tilde{\mathcal{T}}\psi(x, 1) \\
& \leq h_2 + c_2 + \lambda\psi(x, 1) + \mu_1\psi(x+1, 1) + \mu_2\psi(x+2, 0) \\
& \quad + \lambda\psi(x-1, 1) + \mu_1\psi(x, 2) + \mu_1\tilde{c}_1 + \mu_2\psi(x+1, 0) \\
& = \lambda\psi(x, 1) + \mu_1\psi(x+1, 1) + \mu_2\psi(x+2, 0) \\
& \quad + h_2 + c_2 + \lambda\psi(x-1, 1) + \mu_1\psi(x, 2) + \mu_1\tilde{c}_1 + \mu_2\psi(x+1, 0) \\
& = \tilde{\mathcal{T}}\psi(x+1, 1) + \tilde{\mathcal{T}}\psi(x, 0).
\end{aligned}$$

Hence, (EC.18) holds.

Subcase a.ii.3:  $(w_1, w_2) = (1, 2)$ . By (EC.21), the following inequality directly proves (EC.18):

$$\begin{aligned}
& \tilde{\mathcal{T}}\psi(x+1, 0) + \tilde{\mathcal{T}}\psi(x, 1) \\
& \leq h_2 + c_2 + \lambda\psi(x, 1) + \mu_1\psi(x+1, 2) + \mu_1\tilde{c}_1 + \mu_2\psi(x+2, 0) \\
& \quad + \lambda\psi(x-1, 1) + \mu_1\psi(x, 1) + \mu_2\psi(x+1, 0) \\
& = \lambda\psi(x, 1) + \mu_1\psi(x+1, 2) + \mu_1\tilde{c}_1 + \mu_2\psi(x+2, 0) \\
& \quad + h_2 + c_2 + \lambda\psi(x-1, 1) + \mu_1\psi(x, 1) + \mu_2\psi(x+1, 0) \\
& = \tilde{\mathcal{T}}\psi(x+1, 1) + \tilde{\mathcal{T}}\psi(x, 0).
\end{aligned}$$

Subcase a.ii.4:  $(w_1, w_2) = (1, 3)$ . Similar to the subcases above, (EC.18) follows from the following inequality:

$$\begin{aligned}
& \tilde{\mathcal{T}}\psi(x+1, 0) + \tilde{\mathcal{T}}\psi(x, 1) \\
& \leq h_2 + c_2 + \lambda\psi(x, 1) + \mu_1\psi(x+1, 1) + \mu_2\psi(x+2, 0) \\
& \quad + \lambda\psi(x-1, 1) + \mu_1\psi(x, 1) + \mu_2\psi(x+1, 0)
\end{aligned}$$

$$\begin{aligned}
&= \lambda\psi(x, 1) + \mu_1\psi(x + 1, 1) + \mu_2\psi(x + 2, 0) \\
&\quad + h_2 + c_2 + \lambda\psi(x - 1, 1) + \mu_1\psi(x, 1) + \mu_2\psi(x + 1, 0) \\
&= \tilde{\mathcal{T}}\psi(x + 1, 1) + \tilde{\mathcal{T}}\psi(x, 0).
\end{aligned}$$

Subcase a.ii.5:  $(w_1, w_2) = (2, 3)$ . By (EC.21), we have

$$\begin{aligned}
&\tilde{\mathcal{T}}\psi(x + 1, 0) + \tilde{\mathcal{T}}\psi(x, 1) \\
&\leq \lambda\psi(x, 0) + \mu_1\psi(x + 1, 1) + \mu_1\tilde{c}_1 + \mu_2\psi(x + 1, 0) \\
&\quad + \lambda\psi(x - 1, 1) + \mu_1\psi(x, 1) + \mu_2\psi(x + 1, 0) \\
&\leq \lambda\psi(x, 1) + \mu_1\psi(x + 1, 1) + \mu_2\psi(x + 2, 0) \\
&\quad + \lambda\psi(x - 1, 0) + \mu_1\psi(x, 1) + \mu_1\tilde{c}_1 + \mu_2\psi(x, 0) \\
&= \tilde{\mathcal{T}}\psi(x + 1, 1) + \tilde{\mathcal{T}}\psi(x, 0).
\end{aligned}$$

Here, in the second inequality, we compare the left-hand and right-hand sides term by term. The term on the left with coefficient  $\lambda$  is no greater than its counterpart on the right, because of supermodularity of  $\psi(\cdot, \cdot)$ . Likewise, the inequality holds for the terms with coefficient  $\mu_2$ , because of the convexity of  $\psi(\cdot, \cdot)$  with respect to its first coordinate. Finally, the terms with coefficient  $\mu_1$  on the left and right are identical. Thus, the proof of (EC.18) is complete.

Next, we prove (EC.19). Again, let

$$\tilde{\mathcal{T}}\psi(x + 2, 0) = H(x + 2, 0, w_2) \quad \text{and} \quad \tilde{\mathcal{T}}\psi(x, 1) = H(x, 1, w_1). \quad (\text{EC.23})$$

Again, consider two cases:

Case b.i:  $w_1 \geq w_2$ . By (EC.21),

$$\begin{aligned}
&\tilde{\mathcal{T}}\psi(x + 1, 1) + \tilde{\mathcal{T}}\psi(x + 1, 0) \\
&\leq H(x + 1, 1, w_1) + H(x + 1, 0, w_2) \\
&\leq H(x + 1, 1, w_2) + H(x, 1, w_1) - H(x, 1, w_2) + H(x + 1, 0, w_2) \\
&\leq H(x + 2, 0, w_2) + H(x, 1, w_1) \\
&= \tilde{\mathcal{T}}\psi(x + 2, 0) + \tilde{\mathcal{T}}\psi(x, 1),
\end{aligned}$$

where the second inequality comes from the submodularity of  $H(x, y, w)$  in  $(x, w)$ , and the last inequality comes from the fact that  $H(x, y, w)$  satisfies Property (P2) for fixed  $w$ . (EC.19) directly follows.

Case b.ii:  $w_1 < w_2$ . Similar to Case a.ii, we have  $(w_1, w_2) = (2, 3)$ . Then, by (EC.21),

$$\begin{aligned} & \tilde{\mathcal{T}}\psi(x+1, 1) + \tilde{\mathcal{T}}\psi(x+1, 0) \\ & \leq \lambda\psi(x, 1) + \mu_1\psi(x+1, 1) + \mu_2\psi(x+2, 0) \\ & \quad + \lambda\psi(x, 0) + \mu_1\psi(x+1, 1) + \mu_1\tilde{c}_1 + \mu_2\psi(x+1, 0). \end{aligned} \tag{EC.24}$$

By Properties (P1)-(P3) for  $\psi(x, y)$ , we have

$$\begin{aligned} & \lambda\Delta_{xy}\psi(x-1, 0) + \mu_1 \left[ \Delta_{xy}\psi(x, 0) + \Delta_{xy}\psi(x, 0) \right] \\ & \leq \lambda\Delta_{xx}\psi(x-1, 0) + \mu_1 \left[ \Delta_{yy}\psi(x, 0) + \Delta_{xx}\psi(x, 0) \right]. \end{aligned}$$

This implies

$$\begin{aligned} & \lambda\psi(x, 1) + \mu_1\psi(x+1, 1) + \mu_2\psi(x+2, 0) \\ & \quad + \lambda\psi(x, 0) + \mu_1\psi(x+1, 1) + \mu_1\tilde{c}_1 + \mu_2\psi(x+1, 0) \\ & \leq \lambda\psi(x-1, 1) + \mu_1\psi(x, 2) + \mu_1\tilde{c}_1 + \mu_2\psi(x+1, 0) \\ & \quad + \lambda\psi(x+1, 0) + \mu_1\psi(x+2, 0) + \mu_2\psi(x+2, 0). \end{aligned} \tag{EC.25}$$

From (EC.23),

$$\begin{aligned} \tilde{\mathcal{T}}\psi(x, 1) + \tilde{\mathcal{T}}\psi(x+2, 0) & = \lambda\psi(x-1, 1) + \mu_1\psi(x, 2) + \mu_1\tilde{c}_1 + \mu_2\psi(x+1, 0) \\ & \quad + \lambda\psi(x+1, 0) + \mu_1\psi(x+2, 0) + \mu_2\psi(x+2, 0). \end{aligned} \tag{EC.26}$$

Hence, we obtain (EC.19) by (EC.24)-(EC.26).

Finally we prove inequality (EC.20). Let

$$\tilde{\mathcal{T}}\psi(x, 2) = H(x, 2, w_2) \quad \text{and} \quad \tilde{\mathcal{T}}\psi(x+1, 0) = H(x+1, 0, w_1).$$

Consider two cases:

Case c.i:  $w_1 \geq w_2$ . By (EC.21),

$$\begin{aligned} \tilde{\mathcal{T}}\psi(x+1, 1) + \tilde{\mathcal{T}}\psi(x, 1) & \leq H(x+1, 1, w_1) + H(x, 1, w_2) \\ & \leq H(x+1, 1, w_1) + H(x, 1, w_1) + H(x, 2, w_2) - H(x, 2, w_1) \\ & \leq H(x+1, 0, w_1) + H(x, 2, w_2) \\ & = \tilde{\mathcal{T}}\psi(x+1, 0) + \tilde{\mathcal{T}}\psi(x, 2). \end{aligned}$$

Here, the second inequality comes from the submodularity of  $H(x, y, w)$  in  $(y, w)$ , and the last inequality is due to the fact that  $H(x, y, w)$  satisfies Property (P3) for fixed  $w$ . Hence, we have (EC.20).

Case c.ii:  $w_2 > w_1$ . Similar to Case a.ii, we consider five subcases,  $(w_1, w_2) = (0, 3)$ ,  $(w_1, w_2) = (1, 3)$ ,  $(w_1, w_2) = (2, 3)$ ,  $(w_1, w_2) = (0, 2)$ , and  $(w_1, w_2) = (1, 2)$ .

Subcase c.ii.1:  $(w_1, w_2) = (0, 3)$ . By (EC.21),

$$\begin{aligned}
& \tilde{\mathcal{T}}\psi(x+1, 1) + \tilde{\mathcal{T}}\psi(x, 1) \\
& \leq \lambda\psi(x, 1) + \mu_1\psi(x+1, 2) + \mu_1\tilde{c}_1 + \mu_2\psi(x+2, 0) \\
& \quad + h_2 + c_2 + \lambda\psi(x-1, 2) + \mu_1\psi(x, 2) + \mu_2\psi(x+1, 1) \\
& = \lambda\psi(x-1, 2) + \mu_1\psi(x, 2) + \mu_2\psi(x+1, 1) \\
& \quad + h_2 + c_2 + \lambda\psi(x, 1) + \mu_1\psi(x+1, 2) + \mu_1\tilde{c}_1 + \mu_2\psi(x+2, 0) \\
& = \tilde{\mathcal{T}}\psi(x, 2) + \tilde{\mathcal{T}}\psi(x+1, 0).
\end{aligned}$$

This implies (EC.20).

Subcase c.ii.2:  $(w_1, w_2) = (1, 3)$ . (EC.20) directly follows from the following inequality:

$$\begin{aligned}
& \tilde{\mathcal{T}}\psi(x+1, 1) + \tilde{\mathcal{T}}\psi(x, 1) \\
& \leq \lambda\psi(x, 1) + \mu_1\psi(x+1, 1) + \mu_2\psi(x+2, 0) \\
& \quad + h_2 + c_2 + \lambda\psi(x-1, 2) + \mu_1\psi(x, 2) + \mu_2\psi(x+1, 1) \\
& = \lambda\psi(x-1, 2) + \mu_1\psi(x, 2) + \mu_2\psi(x+1, 1) \\
& \quad + h_2 + c_2 + \lambda\psi(x, 1) + \mu_1\psi(x+1, 1) + \mu_2\psi(x+2, 0) \\
& = \tilde{\mathcal{T}}\psi(x, 2) + \tilde{\mathcal{T}}\psi(x+1, 0).
\end{aligned}$$

Subcase c.ii.3:  $(w_1, w_2) = (2, 3)$ . By (16),

$$\lambda\Delta_{xy}\psi(x-1, 0) + \mu_2\Delta_x\psi(x+1, 0) \leq \lambda\Delta_{yy}\psi(x-1, 0) + \mu_2\Delta_y\psi(x+1, 0).$$

Hence,

$$\begin{aligned}
& \lambda\psi(x, 1) + \mu_1\psi(x+1, 1) + \mu_2\psi(x+2, 0) \\
& \quad + \lambda\psi(x-1, 1) + \mu_1\psi(x, 2) + \mu_1\tilde{c}_1 + \mu_2\psi(x+1, 0) \\
& \leq \lambda\psi(x-1, 2) + \mu_1\psi(x, 2) + \mu_2\psi(x+1, 1) \\
& \quad + \lambda\psi(x, 0) + \mu_1\psi(x+1, 1) + \mu_1\tilde{c}_1 + \mu_2\psi(x+1, 0).
\end{aligned}$$

This implies

$$\begin{aligned}
& \tilde{\mathcal{T}}\psi(x+1, 1) + \tilde{\mathcal{T}}\psi(x, 1) \\
& \leq \lambda\psi(x, 1) + \mu_1\psi(x+1, 1) + \mu_2\psi(x+2, 0)
\end{aligned}$$

$$\begin{aligned}
& + \lambda\psi(x-1,1) + \mu_1\psi(x,2) + \mu_1\tilde{c}_1 + \mu_2\psi(x+1,0) \\
& \leq \lambda\psi(x-1,2) + \mu_1\psi(x,2) + \mu_2\psi(x+1,1) \\
& \quad + \lambda\psi(x,0) + \mu_1\psi(x+1,1) + \mu_1\tilde{c}_1 + \mu_2\psi(x+1,0) \\
& = \tilde{\mathcal{T}}\psi(x,2) + \tilde{\mathcal{T}}\psi(x+1,0),
\end{aligned}$$

which yields (EC.20).

Subcase c.ii.4:  $(w_1, w_2) = (0, 2)$ . Similar to Subcase c.ii.2, (EC.20) directly follows from

$$\begin{aligned}
& \tilde{\mathcal{T}}\psi(x+1,1) + \tilde{\mathcal{T}}\psi(x,1) \\
& \leq \lambda\psi(x,1) + \mu_1\psi(x+1,2) + \mu_1\tilde{c}_1 + \mu_2\psi(x+2,0) \\
& \quad + h_2 + c_2 + \lambda\psi(x-1,2) + \mu_1\psi(x,3) + \mu_1\tilde{c}_1 + \mu_2\psi(x+1,1) \\
& = \lambda\psi(x-1,2) + \mu_1\psi(x,3) + \mu_1\tilde{c}_1 + \mu_2\psi(x+1,1) \\
& \quad + h_2 + c_2 + \lambda\psi(x,1) + \mu_1\psi(x+1,2) + \mu_1\tilde{c}_1 + \mu_2\psi(x+2,0) \\
& = \tilde{\mathcal{T}}\psi(x,2) + \tilde{\mathcal{T}}\psi(x+1,0).
\end{aligned}$$

Subcase c.ii.5:  $(w_1, w_2) = (1, 2)$ . Similar to Subcase c.ii.2, (EC.20) directly follows from

$$\begin{aligned}
& \tilde{\mathcal{T}}\psi(x+1,1) + \tilde{\mathcal{T}}\psi(x,1) \\
& \leq \lambda\psi(x,1) + \mu_1\psi(x+1,1) + \mu_2\psi(x+2,0) \\
& \quad + h_2 + c_2 + \lambda\psi(x-1,2) + \mu_1\psi(x,3) + \mu_1\tilde{c}_1 + \mu_2\psi(x+1,1) \\
& = \lambda\psi(x-1,2) + \mu_1\psi(x,3) + \mu_1\tilde{c}_1 + \mu_2\psi(x+1,1) \\
& \quad + h_2 + c_2 + \lambda\psi(x,1) + \mu_1\psi(x+1,1) + \mu_2\psi(x+2,0) \\
& = \tilde{\mathcal{T}}\psi(x,2) + \tilde{\mathcal{T}}\psi(x+1,0).
\end{aligned}$$

The proof of the lemma is now complete.  $\square$

**Proof of Lemma 10.** It is sufficient to show that

$$\tilde{\mathcal{T}}\psi(x+1, y) \leq \tilde{\mathcal{T}}\psi(x, y+1). \quad (\text{EC.27})$$

Note that

$$\begin{aligned}
& \lambda\psi(x-1, y+1) + \mu_1\left(\psi(x, y+2) + \tilde{c}_1\right) + \mu_2\psi(x+1, y) \\
& \geq \lambda\psi(x, y) + \mu_1\left(\psi(x+1, y+1) + \tilde{c}_1\right) \\
& \quad + \mu_2[\mathbf{I}_{\{y>0\}}\psi(x+2, y-1) + \mathbf{I}_{\{y=0\}}\psi(x+1, y)] \\
& \geq \tilde{\mathcal{T}}\psi(x+1, y), \tag{EC.28}
\end{aligned}$$

$$\begin{aligned}
& \lambda\psi(x-1, y+1) + \mu_1\psi(x, y+1) + \mu_2\psi(x+1, y) \\
& \geq \lambda\psi(x, y) + \mu_1\psi(x+1, y) + \mu_2[\mathbf{I}_{\{y>0\}}\psi(x+2, y-1) + \mathbf{I}_{\{y=0\}}\psi(x+1, y)] \\
& \geq \tilde{\mathcal{T}}\psi(x+1, y), \tag{EC.29}
\end{aligned}$$

and by Lemma 7,

$$\begin{aligned} \tilde{\mathcal{T}}\psi(x, y+1) = \min & \left\{ \lambda\psi(x-1, y+1) + \mu_1 \left( \psi(x, y+2) + \tilde{c}_1 \right) + \mu_2\psi(x+1, y), \right. \\ & \left. \lambda\psi(x-1, y+1) + \mu_1\psi(x, y+1) + \mu_2\psi(x+1, y) \right\}. \end{aligned} \quad (\text{EC.30})$$

(EC.27) directly follows from (EC.28)-(EC.30).  $\square$

**Proof of Lemma 11.** Properties (P1)-(P3) follow from the convexity of  $c(x, y) = hx^+ + bx^- + h_2y$  with respect to  $x$  and  $y$  separately. Note that

$$\Delta_y c(x, y) = h_2 \quad \text{and} \quad \Delta_x c(x, y) = \begin{cases} h, & \text{if } x \geq 0, \\ -b, & \text{if } x < 0. \end{cases}$$

Thus,  $h_2 \geq h \geq 0$  implies (14) and (16).  $\square$

**Proof of Proposition 1.** We use sample-path analysis and the coupling method to prove this result. First, note that any policy for System **M** can be implemented by System **A**. Thus,

$$\tilde{f}(x, y) \leq \hat{f}(x, y, z). \quad (\text{EC.31})$$

Next, we show that the optimal policy in System **A** can also be implemented to System **M**. Comparing the two systems, the only scenario where a policy of System **A** might not be applicable to System **M** is when System **A** turns off server 1 while it's busy. However, for state  $(x, 0)$ , when  $R < S(1) < S(0)$ , from Theorem 1, if server 1 is busy and some other event happens, System **A** will keep server 1 busy. Similarly, for state  $(x, y)$  with  $y > 0$ , from Lemma 5, we know  $S(y) < S(y-1)$ , and again System **A** will keep server 1 busy. Thus, the above scenario will never occur. Hence, the optimal policy for System **A** can indeed be implemented in System **M**. Thus,

$$\tilde{f}(x, y) \geq \hat{f}(x, y, z). \quad (\text{EC.32})$$

Combining (EC.31)-(EC.32) yields the result.  $\square$

**Proof of Proposition 2.** It is straightforward to verify that, if  $c_2(1-\lambda) - \mu_1\tilde{c}_1 \geq \mu_2b/\alpha$ , then

$$h_2 + (1-\lambda)c_2 - \mu_1\tilde{c}_1 + \mu_2\Delta_x c(x, y) \geq 0.$$

Hence, to prove the proposition, it is sufficient to show that if  $g(x, y)$  satisfies (18) and Properties (P1)-(P3), then

$$h_2 + (1-\lambda)c_2 - \mu_1\tilde{c}_1 + \mu_2\Delta_x [hx^+ + bx^- + h_2y + \tilde{\mathcal{T}}g(x, y)] \geq 0. \quad (\text{EC.33})$$

Define

$$\begin{aligned} S^g(y) &= \min\{x : \Delta_y g(x, y) + \tilde{c}_1 \geq 0\}, \\ R^g &= \min \left\{ x : h_2 + c_2 - \mu_1\tilde{c}_1 + \lambda\Delta_y g(x-1, 0) + \mu_2\Delta_x g(x, 0) \right. \\ &\quad \left. \geq -\mu_1(\Delta_y g(x, 1) + \tilde{c}_1)\mathbf{I}_{\{x < S^g(1)\}} - \mu_1(\Delta_y g(x, 0) + \tilde{c}_1)\mathbf{I}_{\{x \geq S^g(0)\}} \right\}. \end{aligned}$$

Based on the discussion above, we have

$$R^g < S^g(1) < S^g(0).$$

To prove (EC.33), first consider  $y = 0$ . If  $x + 1 < R^g$ , then (EC.33) holds, because

$$\begin{aligned}
& h_2 + (1 - \lambda)c_2 - \mu_1\tilde{c}_1 + \mu_2\Delta_x(hx^+ + bx^- + \tilde{T}g(x, 0)) \\
&= h_2 + (1 - \lambda)c_2 - \mu_1\tilde{c}_1 + \mu_2(h\mathbf{I}_{\{x \geq 0\}} - b\mathbf{I}_{\{x < 0\}}) + \mu_2[\lambda\Delta_x g(x - 1, 1) \\
&\quad + \mu_1\Delta_x g(x, 2) + \mu_2\Delta_x g(x + 1, 0)] \\
&\geq [h_2 + (1 - \lambda)c_2 - \mu_1\tilde{c}_1]\alpha - \mu_2b + [h_2 + (1 - \lambda)c_2 - \mu_1\tilde{c}_1](\lambda + \mu_1 + \mu_2) \\
&\quad + \mu_2[\lambda\Delta_x g(x - 1, 1) + \mu_1\Delta_x g(x, 2) + \mu_2\Delta_x g(x + 1, 0)] \\
&\geq \lambda[h_2 + (1 - \lambda)c_2 - \mu_1\tilde{c}_1 + \mu_2\Delta_x g(x - 1, 1)] \\
&\quad + \mu_1[h_2 + (1 - \lambda)c_2 - \mu_1\tilde{c}_1 + \mu_2\Delta_x g(x, 2)] \\
&\quad + \mu_2[h_2 + (1 - \lambda)c_2 - \mu_1\tilde{c}_1 + \mu_2\Delta_x g(x + 1, 0)] \\
&\geq 0.
\end{aligned} \tag{EC.34}$$

Here, the second inequality comes from the assumption  $h_2 + c_2(1 - \lambda) - \mu_1\tilde{c}_1 \geq \mu_2b/\alpha$ , and the last inequality holds because  $g(x, y)$  satisfies (18).

If  $x + 1 = R^g$ , (EC.33) holds, provided that

$$\begin{aligned}
& h_2 + (1 - \lambda)c_2 - \mu_1\tilde{c}_1 + \mu_2\Delta_x(hx^+ + bx^- + \tilde{T}g(x, 0)) \\
&= h_2 + (1 - \lambda)c_2 - \mu_1\tilde{c}_1 + \mu_2(h\mathbf{I}_{\{x \geq 0\}} - b\mathbf{I}_{\{x < 0\}}) \\
&\quad + \mu_2\left(-h_2 - c_2 + \lambda\Delta_x g(x - 1, 0) + \mu_1\Delta_x g(x, 1)\right) \\
&\quad - \mu_2\left(\lambda\Delta_y g(x - 1, 0) + \mu_1\Delta_y g(x, 1)\right) \\
&\geq 0.
\end{aligned} \tag{EC.35}$$

But (EC.35) is equivalent to

$$\begin{aligned}
& h_2 + (1 - \lambda)c_2 - \mu_1\tilde{c}_1 + \mu_2(h\mathbf{I}_{\{x \geq 0\}} - b\mathbf{I}_{\{x < 0\}}) \\
&\quad + \mu_2\left(-h_2 - c_2 + \lambda\Delta_x g(x - 1, 0) + \mu_1\Delta_x g(x, 1)\right) \\
&\quad \geq \mu_2\left(\lambda\Delta_y g(x - 1, 0) + \mu_1\Delta_y g(x, 1)\right)
\end{aligned}$$

Adding  $\mu_2^2\Delta_x g(x, 0) + \mu_2(h_2 + c_2)$  to both sides of the inequality above, similar to (EC.34), the left-hand side is nonnegative, and the right-hand side is negative, since  $x < x + 1 = R^g$  implies

$$\mu_2\left(h_2 + c_2 + \lambda\Delta_y g(x - 1, 0) + \mu_2\Delta_x g(x, 0) + \mu_1\Delta_y g(x, 1)\right) < 0.$$

If  $R^g \leq x < x+1 < S^g(0)$ , then (EC.33) holds, because

$$\begin{aligned}
& h_2 + (1-\lambda)c_2 - \mu_1\tilde{c}_1 + \mu_2\Delta_x(hx^+ + bx^- + \tilde{\mathcal{T}}g(x,0)) \\
&= h_2 + (1-\lambda)c_2 - \mu_1\tilde{c}_1 + \mu_2(h\mathbf{I}_{\{x \geq 0\}} - b\mathbf{I}_{\{x < 0\}}) \\
&\quad + \mu_2\left(\lambda\Delta_x g(x-1,0) + \mu_1\Delta_x g(x,1) + \mu_2\Delta_x g(x,0)\right) \\
&\geq 0.
\end{aligned} \tag{EC.36}$$

If  $S^g(0) = x+1$ , then (EC.33) holds, because

$$\begin{aligned}
& h_2 + (1-\lambda)c_2 - \mu_1\tilde{c}_1 + \mu_2\Delta_x(hx^+ + bx^- + \tilde{\mathcal{T}}g(x,0)) \\
&= h_2 + (1-\lambda)c_2 - \mu_1\tilde{c}_1 + \mu_2(h\mathbf{I}_{\{x \geq 0\}} - b\mathbf{I}_{\{x < 0\}}) \\
&\quad + \mu_2\left(\lambda\Delta_x g(x-1,0) + \mu_1\Delta_x g(x,0) + \mu_2\Delta_x g(x,0)\right) - \mu_2\mu_1[\Delta_y g(x,0) + \tilde{c}_1] \\
&\geq 0,
\end{aligned}$$

where the last inequality holds, since  $\Delta_y g(x,0) + \tilde{c}_1 < 0$ , by  $x < x+1 = S^g(0)$ .

If  $x \geq S^g(0)$ , (EC.33) holds, because

$$\begin{aligned}
& h_2 + (1-\lambda)c_2 - \mu_1\tilde{c}_1 + \mu_2\Delta_x(hx^+ + bx^- + \tilde{\mathcal{T}}g(x,0)) \\
&= h_2 + (1-\lambda)c_2 - \mu_1\tilde{c}_1 + \mu_2(h\mathbf{I}_{\{x \geq 0\}} - b\mathbf{I}_{\{x < 0\}}) \\
&\quad + \mu_2\left(\lambda\Delta_x g(x-1,0) + \mu_1\Delta_x g(x,0) + \mu_2\Delta_x g(x,0)\right) \\
&\geq 0.
\end{aligned} \tag{EC.37}$$

Finally, consider  $y > 0$ . If  $x+1 < S^g(y)$ , then (EC.33) can be proven similar to (EC.36). If  $x \geq S^g(y)$ , one can prove (EC.33) along the lines of the proof of (EC.37). If  $x+1 = S^g(y)$ , (EC.33) holds, by

$$\begin{aligned}
& h_2 + (1-\lambda)c_2 - \mu_1\tilde{c}_1 + \mu_2\Delta_x(hx^+ + bx^- + h_2y + \tilde{\mathcal{T}}g(x,y)) \\
&= h_2 + (1-\lambda)c_2 - \mu_1\tilde{c}_1 + \mu_2(h\mathbf{I}_{\{x \geq 0\}} - b\mathbf{I}_{\{x < 0\}}) \\
&\quad + \mu_2\left(\lambda\Delta_x g(x-1,y) + \mu_1\Delta_x g(x,y) + \mu_2\Delta_x g(x+1,y-1)\right) \\
&\quad - \mu_2\mu_1[\Delta_y g(x,y) + \tilde{c}_1],
\end{aligned}$$

where  $\Delta_y g(x,y) + \tilde{c}_1 \leq 0$  by  $x < S^g(y)$ .  $\square$

**Proof of Lemma 12.** It is direct to verify that  $\mathcal{T}^{(1)}\psi(x,y)$  satisfies (21). Here we omit this verification. We now prove the supermodularity (Property (P1)) of  $\mathcal{T}^{(1)}\psi(x,y)$ :

$$\mathcal{T}^{(1)}\psi(x+1,y+1) + \mathcal{T}^{(1)}\psi(x,y) \geq \mathcal{T}^{(1)}\psi(x,y+1) + \mathcal{T}^{(1)}\psi(x+1,y), \tag{EC.38}$$

As  $\psi(x, y)$  satisfies (21), we have that for any  $x$  and  $y \geq 1$ ,

$$\mathcal{T}^{(1)}\psi(x, y) = \lambda\psi(x-1, y) + \mu_2\psi(x+1, y-1). \quad (\text{EC.39})$$

Consider (EC.38) for  $y \geq 1$ . In view of (EC.39), we have

$$\begin{aligned} & \mathcal{T}^{(1)}\psi(x+1, y+1) + \mathcal{T}^{(1)}\psi(x, y) \\ &= \lambda\psi(x, y+1) + \mu_2\psi(x+2, y) + \lambda\psi(x-1, y) + \mu_2\psi(x+1, y-1), \end{aligned} \quad (\text{EC.40})$$

$$\begin{aligned} & \mathcal{T}^{(1)}\psi(x, y+1) + \mathcal{T}^{(1)}\psi(x+1, y) \\ &= \lambda\psi(x-1, y+1) + \mu_2\psi(x+1, y) + \lambda\psi(x, y) + \mu_2\psi(x+2, y-1). \end{aligned} \quad (\text{EC.41})$$

By  $\Delta_{xy}\psi(x-1, y) \geq 0$  and  $\Delta_{xy}\psi(x+1, y-1) \geq 0$ , (EC.38) follows directly from (EC.40)-(EC.41).

Next, consider (EC.38) for  $y = 0$ . Let

$$\begin{aligned} u_1(x) = \arg \min_{u \geq 0} & \left\{ (c_2 + h_2)u + \lambda\psi(x-1, u) \right. \\ & \left. + \mu_2 \left[ \mathbf{I}_{\{u>0\}}\psi(x+1, u-1) + \mathbf{I}_{\{u=0\}}\psi(x, u) \right] \right\}. \end{aligned}$$

To prove (EC.38) for  $y = 0$ , consider two cases:

$$\text{Case a.i } u_1(x) > 0; \quad \text{Case a.ii } u_1(x) = 0.$$

In Case a.i, by the fact that  $\psi(x, y)$  satisfies (21), we must have  $u_1(x) = 1$ . Hence, again by (EC.39),

$$\mathcal{T}^{(1)}\psi(x+1, 1) + \mathcal{T}^{(1)}\psi(x, 0) \quad (\text{EC.42})$$

$$= \lambda\psi(x, 1) + \mu_2\psi(x+2, 0) + (c_2 + h_2) + \lambda\psi(x-1, 1) + \mu_2\psi(x+1, 0),$$

$$\mathcal{T}^{(1)}\psi(x, 1) + \mathcal{T}^{(1)}\psi(x+1, 0) \quad (\text{EC.43})$$

$$\leq \lambda\psi(x-1, 1) + \mu_2\psi(x+1, 0) + (c_2 + h_2) + \lambda\psi(x, 1) + \mu_2\psi(x+2, 0).$$

This implies (EC.38).

In Case a.ii, using (EC.39),

$$\mathcal{T}^{(1)}\psi(x+1, 1) + \mathcal{T}^{(1)}\psi(x, 0) \quad (\text{EC.44})$$

$$= \lambda\psi(x, 1) + \mu_2\psi(x+2, 0) + \lambda\psi(x-1, 0) + \mu_2\psi(x, 0),$$

$$\mathcal{T}^{(1)}\psi(x, 1) + \mathcal{T}^{(1)}\psi(x+1, 0) \quad (\text{EC.45})$$

$$\leq \lambda\psi(x-1, 1) + \mu_2\psi(x+1, 0) + \lambda\psi(x, 0) + \mu_2\psi(x+1, 0).$$

By  $\Delta_{xy}\psi(x-1, 0) \geq 0$  and  $\Delta_{xx}\psi(x, 0) \geq 0$ , (EC.44)-(EC.45) imply (EC.38).

Finally, we prove that  $\mathcal{T}^{(1)}\psi(x, y)$  satisfies Property (P2). We need to show that

$$\mathcal{T}^{(1)}\psi(x+2, y) + \mathcal{T}^{(1)}\psi(x, y+1) \geq \mathcal{T}^{(1)}\psi(x+1, y+1) + \mathcal{T}^{(1)}\psi(x+1, y). \quad (\text{EC.46})$$

Along the same lines as the proof of (EC.38), one can show (EC.46). We omit the details.  $\square$

**Proof of Theorem 4.** First, we show that  $f^{(1)}(\cdot, \cdot)$  satisfies (21). It follows from (20) that

$$\begin{aligned}
& c_2 + \Delta_y f^{(1)}(x, y) \\
&= c_2 + h_2 + \min_{u \geq y+1} \left\{ (c_2 + h_2)(u - y - 1) + \lambda f^{(1)}(x - 1, u) \right. \\
&\quad \left. + \mu_2 [\mathbf{I}_{\{u > 0\}} f^{(1)}(x + 1, u - 1) + \mathbf{I}_{\{u = 0\}} f^{(1)}(x, 0)] \right\} \\
&\quad - \min_{u \geq y} \left\{ (c_2 + h_2)(u - y) + \lambda f^{(1)}(x - 1, u) \right. \\
&\quad \left. + \mu_2 [\mathbf{I}_{\{u > 0\}} f^{(1)}(x + 1, u - 1) + \mathbf{I}_{\{u = 0\}} f^{(1)}(x, 0)] \right\} \\
&= \min_{u \geq y+1} \left\{ (c_2 + h_2)(u - y) + \lambda f^{(1)}(x - 1, u) \right. \\
&\quad \left. + \mu_2 [\mathbf{I}_{\{u > 0\}} f^{(1)}(x + 1, u - 1) + \mathbf{I}_{\{u = 0\}} f^{(1)}(x, 0)] \right\} \\
&\quad - \min_{u \geq y} \left\{ (c_2 + h_2)(u - y) + \lambda f^{(1)}(x - 1, u) \right. \\
&\quad \left. + \mu_2 [\mathbf{I}_{\{u > 0\}} f^{(1)}(x + 1, u - 1) + \mathbf{I}_{\{u = 0\}} f^{(1)}(x, 0)] \right\} \\
&\geq 0.
\end{aligned}$$

Hence, we have (21).

Now we show that  $f^{(1)}(\cdot, \cdot)$  satisfies Properties (P1)-(P2). Let  $\psi(x, y) = hx^+ + bx^-$ . Then we know that  $\psi(\cdot, \cdot)$  satisfies Properties (P1)-(P2). Then by Lemma 12, similar to the arguments in the proof of Theorem 2, we know that  $f^{(1)}(\cdot, \cdot)$  satisfies Properties (P1)-(P2).

It follows from the definition of  $S$  given by (22) that  $S$  is unique. The optimality of not ordering when  $y > 0$  directly follows from (21). For  $y = 0$ , we consider only two possible actions, placing an order and not ordering. Then, the optimality equation (20) simplifies to

$$\begin{aligned}
f^{(1)}(x, 0) &= hx^+ + bx^- + \min_{u \in \{0, 1\}} \left\{ (c_2 + h_2)u + \lambda f^{(1)}(x - 1, u) \right. \\
&\quad \left. + \mu_2 [\mathbf{I}_{\{u > 0\}} f^{(1)}(x + 1, u - 1) + \mathbf{I}_{\{u = 0\}} f^{(1)}(x, 0)] \right\} \\
&= hx^+ + bx^- + \min \left\{ c_2 + h_2 + \lambda f^{(1)}(x - 1, 1) + \mu_2 f^{(1)}(x + 1, 0), \right. \\
&\quad \left. \lambda f^{(1)}(x - 1, 0) + \mu_2 f^{(1)}(x, 0) \right\} \\
&= hx^+ + bx^- + \lambda f^{(1)}(x - 1, 0) + \mu_2 f^{(1)}(x, 0) \\
&\quad + \min \left\{ c_2 + h_2 + \lambda \Delta_y f^{(1)}(x - 1, 0) + \mu_2 \Delta_x f^{(1)}(x, 0), 0 \right\}.
\end{aligned}$$

The theorem now follows.  $\square$
